# Supplementary material for: Evidence for 2-Methoxyestradiol-Mediated Inhibition of Receptor Tyrosine Kinase RON in the Management of Prostate Cancer
Source: PubMed Central journal article supplement (PMC7918140; doi:10.3390/ijms22041852), 2021-02-12
Supplement: ijms-22-01852-s001.pdf [file ijms-22-01852-s001.pdf]

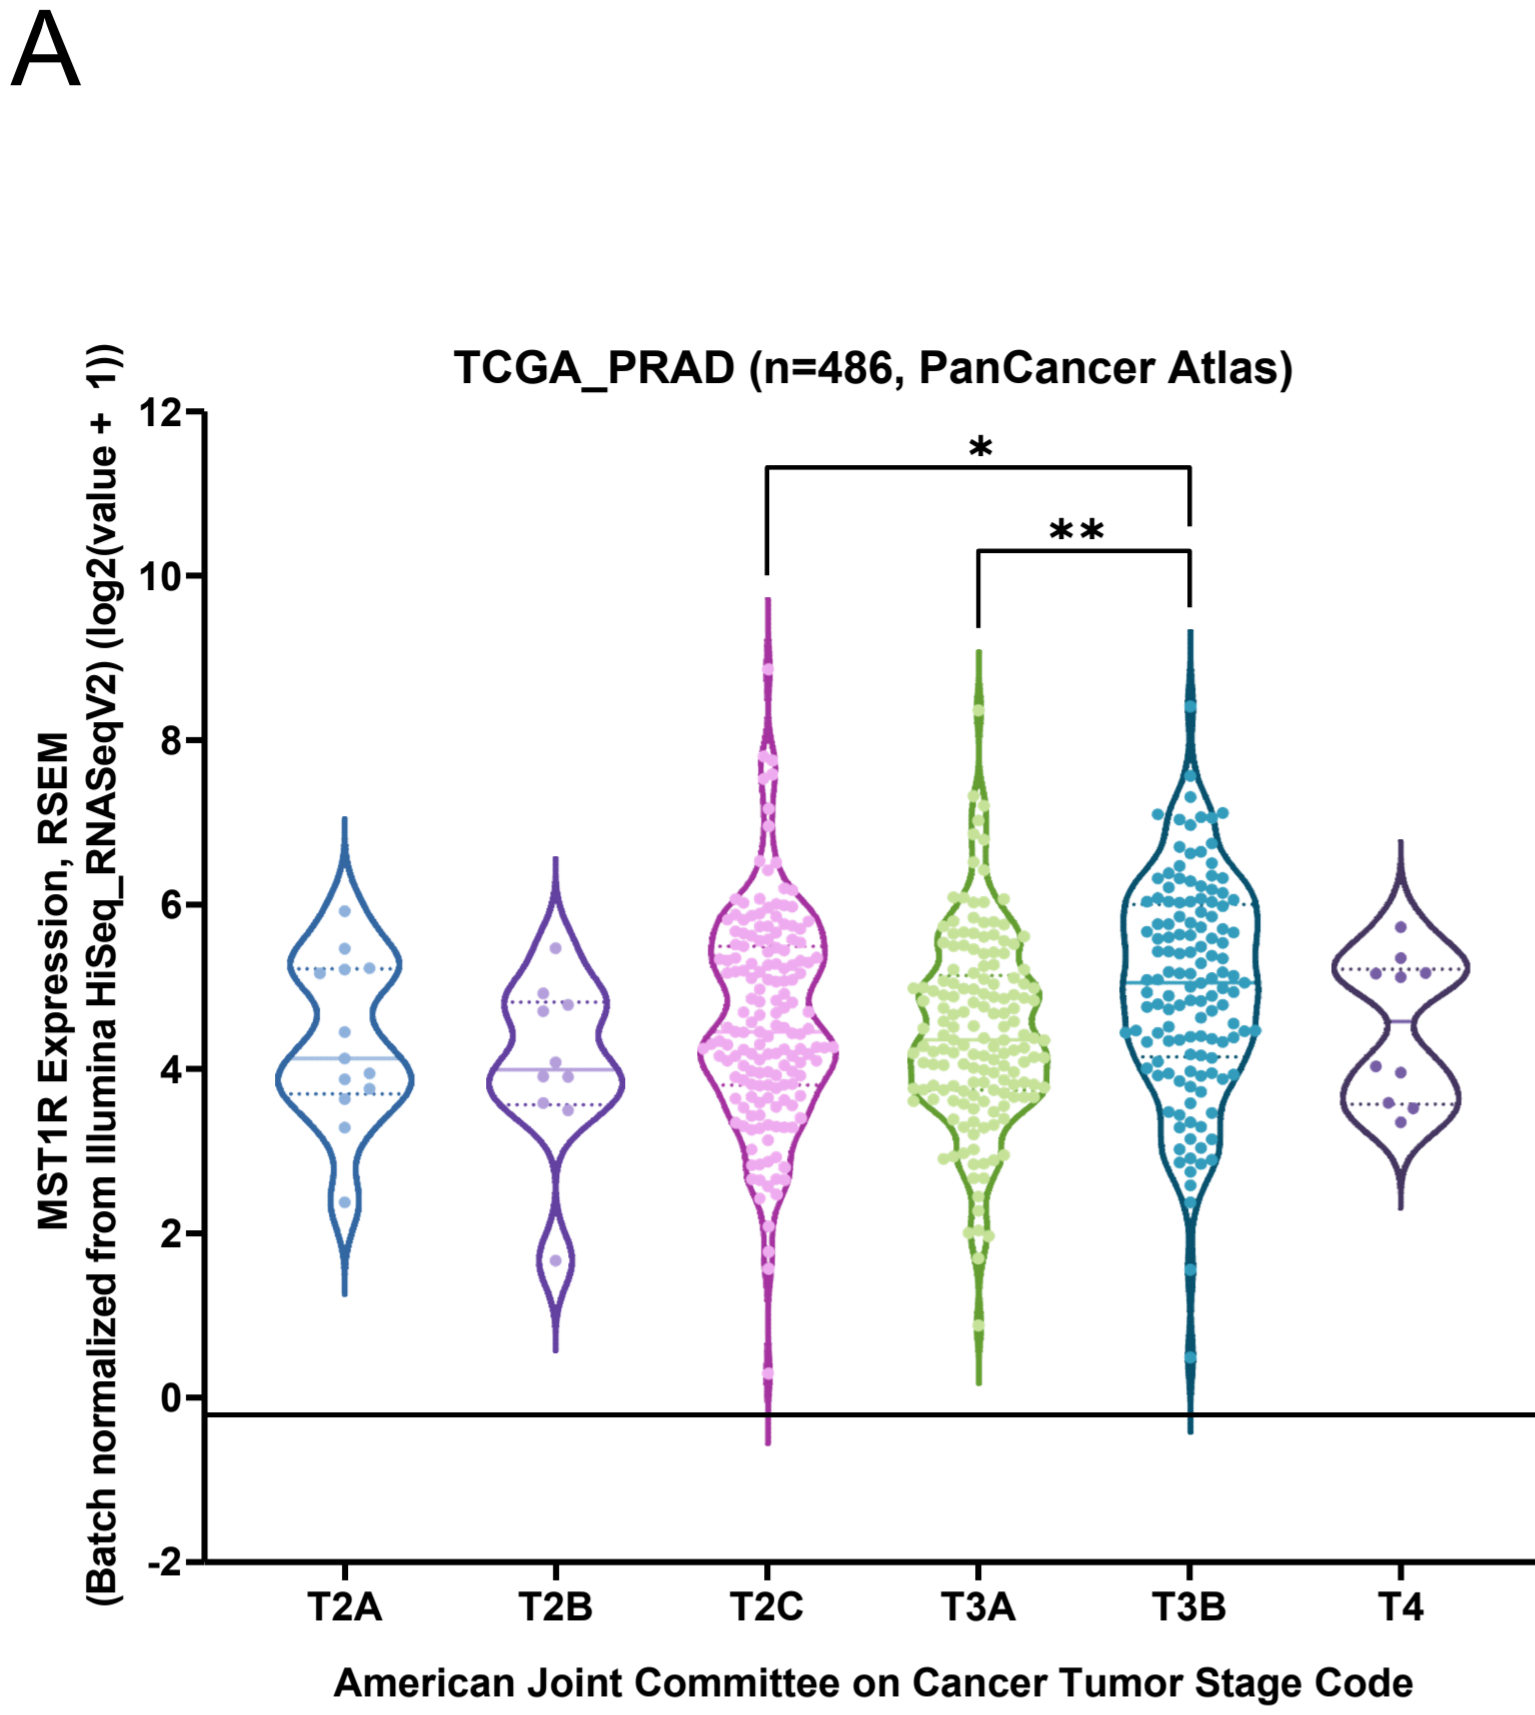

**C**

|          |       |       |       |
|----------|-------|-------|-------|
| AHNAK    | -1.60 | -2.66 | -1.73 |
| AKT1     | -1.45 | -2.59 | -1.85 |
| BMP1     | -1.47 | -1.83 | -1.18 |
| BMP7     | -1.41 | 1.94  | -3.62 |
| CALD1    | -1.40 | -1.18 | 1.11  |
| CAMK2N1  | -1.90 | -1.43 | -1.13 |
| CAV2     | -1.58 | 1.23  | 1.03  |
| CDH1     | -1.23 | 1.49  | -1.67 |
| CDH2     | -1.82 | 1.50  | -1.66 |
| COL1A2   | -1.96 | 4.88  | -1.33 |
| COL3A1   | -2.44 | -1.55 | -1.96 |
| COL5A2   | -1.88 | 1.04  | -1.60 |
| CTNNA1   | -1.20 | 1.11  | -1.01 |
| DSC2     | -1.32 | 1.38  | -1.06 |
| DSP      | -1.71 | 1.01  | 1.03  |
| EGFR     | -1.66 | -1.56 | -1.12 |
| ERBB3    | -1.53 | -1.23 | 1.25  |
| ESR1     | 1.19  | 1.12  | -2.21 |
| F11R     | -1.49 | -1.01 | -2.27 |
| FGFBP1   | -1.55 | 1.60  | -2.06 |
| FN1      | -1.66 | -1.54 | -1.41 |
| FOXC2    | 1.12  | -1.56 | 1.03  |
| FZD7     | -1.63 | -1.07 | 1.15  |
| GNG11    | 1.05  | -1.14 | -1.11 |
| GSC      | -1.32 | 1.44  | -1.23 |
| GSK3B    | -1.00 | -1.34 | 1.70  |
| IGFBP4   | -1.34 | -1.32 | -1.54 |
| IL1RN    | 1.03  | 1.46  | 1.14  |
| ILK      | -1.02 | 1.15  | -1.23 |
| ITGA5    | -1.45 | -1.36 | -2.63 |
| ITGAV    | -1.31 | 1.32  | -1.35 |
| ITGB1    | -1.27 | -1.03 | -1.34 |
| JAG1     | -1.96 | -1.98 | -1.33 |
| KRT14    | 1.19  | 1.01  | -1.14 |
| KRT19    | -1.30 | 1.29  | -1.55 |
| KRT7     | -1.98 | -1.03 | -1.92 |
| MAP1B    | -1.71 | -1.33 | 1.05  |
| MITF     | -1.14 | 1.03  | 1.45  |
| MMP2     | -1.18 | -1.18 | 1.32  |
| MMP3     | -1.58 | -1.55 | 1.38  |
| MMP9     | 1.02  | 1.86  | 1.99  |
| MSN      | -1.90 | 1.35  | -1.99 |
| MST1R    | -1.69 | -3.26 | -1.60 |
| NODAL    | -1.45 | -2.02 | 1.13  |
| NOTCH1   | -1.25 | -2.94 | -1.56 |
| NUDT13   | -1.65 | -1.05 | -1.34 |
| OCLN     | -1.20 | 1.45  | 1.32  |
| PDGFRB   | -1.27 | -2.72 | -1.91 |
| PLEK2    | 1.03  | 1.77  | 1.65  |
| PPPDE2   | -1.72 | 1.26  | -1.03 |
| PTK2     | -1.80 | 1.39  | -2.47 |
| PTP4A1   | -1.30 | 1.19  | -1.10 |
| RAC1     | -1.40 | 1.93  | -1.04 |
| RGS2     | 1.11  | 1.30  | 1.17  |
| SERPINE1 | -1.35 | -1.21 | -1.23 |
| SIP1     | -1.23 | 1.15  | 1.16  |
| SMAD2    | -1.55 | 1.29  | 1.05  |
| SNAI1    | -1.40 | 1.48  | -1.77 |
| SNAI2    | -1.27 | 1.62  | 1.32  |
| SNAI3    | -1.09 | -1.03 | 1.82  |
| SOX10    | -4.15 | 1.15  | -5.40 |
| SPARC    | -2.13 | 1.03  | -2.05 |
| SPP1     | -2.23 | -1.51 | -1.30 |
| STAT3    | -1.06 | -2.29 | 1.32  |
| STEAP1   | -1.07 | 1.15  | 1.56  |
| TCF3     | -1.67 | -1.22 | 1.32  |
| TCF4     | -1.67 | -1.36 | -1.11 |
| TFPI2    | -1.12 | 1.08  | 1.40  |
| TGFB1    | -1.51 | -1.47 | -2.94 |
| TGFB2    | -1.67 | -1.23 | 1.41  |
| TGFB3    | -1.58 | 1.65  | -1.91 |
| TIMP1    | -1.18 | 1.24  | 1.64  |
| TMEFF1   | -1.65 | 1.05  | 1.05  |
| TMEM132A | -1.48 | -3.52 | -1.15 |
| TSPAN13  | -1.24 | 1.39  | -1.25 |
| TWIST1   | -1.64 | -1.08 | -1.83 |
| VCAN     | -4.21 | 4.30  | -3.69 |
| VIM      | -1.08 | -1.12 | 1.33  |
| VPS13A   | -1.62 | -1.08 | -1.05 |
| WNT11    | 1.56  | 1.86  | 1.63  |
| WNT5A    | -1.61 | -1.53 | -2.24 |
| WNT5B    | 1.00  | 3.31  | 1.03  |
| ZEB1     | -1.96 | -1.02 | -1.18 |
| ZEB2     | -1.86 | -1.14 | -1.58 |

**B**

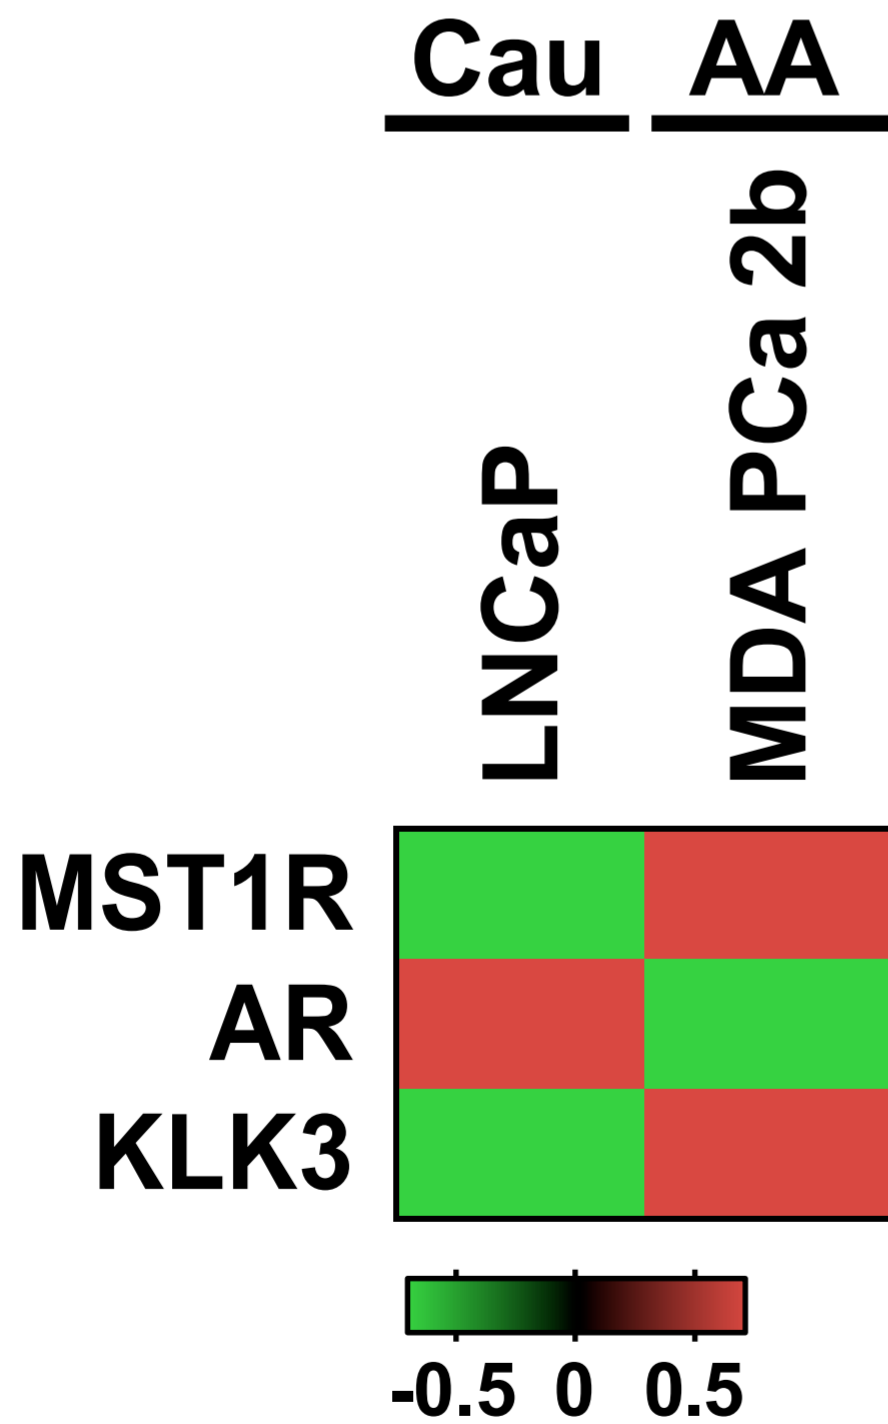

| Sham castrated control   | Normal         | LGPIN | HGPIN | Ca |
|--------------------------|----------------|-------|-------|----|
| 8625                     | —              | —     | —     | +  |
| 8627                     | —              | —     | —     | +  |
| 8628                     | —              | —     | —     | +  |
| 8629                     | —              | —     | —     | +  |
| 8630                     | —              | —     | +     | —  |
| 5981                     | —              | —     | —     | +  |
| 5982                     | —              | —     | —     | +  |
| 5983                     | —              | —     | —     | +  |
| 5985                     | —              | —     | —     | +  |
| 5989                     | —              | —     | —     | +  |
| Sham castrated low dose  | Normal         | LGPIN | HGPIN | Ca |
| 4897                     | —              | —     | +     | —  |
| 8661                     | —              | —     | —     | +  |
| 8669                     | —              | +     | —     | —  |
| 8681                     | —              | —     | +     | —  |
| 8683                     | —              | —     | —     | +  |
| 8685                     | —              | —     | —     | +  |
| 5923                     | Small prostate |       |       |    |
| 5926                     | —              | —     | —     | +  |
| 5928                     | —              | —     | +     | —  |
| 5930                     | —              | —     | +     | —  |
| Sham castrated high dose | Normal         | LGPIN | HGPIN | Ca |
| 5961                     | —              | —     | —     | +  |
| 5969                     | +              | —     | —     | —  |
| 8638                     | —              | +     | —     | —  |
| 8632                     | —              | —     | +     | —  |
| 8633                     | +              | —     | —     | —  |
| 8636                     | —              | —     | —     | +  |
| 8639                     | +              | —     | —     | —  |
| 8640                     | —              | —     | —     | +  |
| 8691                     | —              | +     | —     | —  |
| 8700                     | —              | —     | —     | +  |

| <b>Castrated control<br/>An.ID</b> | <b>Normal</b>     | <b>LGPIN</b> | <b>HGPIN</b> | <b>Ca</b> |
|------------------------------------|-------------------|--------------|--------------|-----------|
| 8647                               | +                 | —            | —            | —         |
| 8648                               | +                 | —            | —            | —         |
| 8649                               | —                 | —            | —            | +         |
| 8650                               | +                 | —            | —            | —         |
| 5952                               | —                 | —            | —            | +         |
| 5953                               | —                 | +            | —            | +         |
| 5954                               | —                 | —            | +            | —         |
| 5956                               | —                 | —            | —            | +         |
| 5958                               | +                 | —            | —            | —         |
| 5960                               | —                 | —            | —            | +         |
| <b>Castrated low dose</b>          | <b>Normal</b>     | <b>LGPIN</b> | <b>HGPIN</b> | <b>Ca</b> |
| 5932                               | +                 | —            | —            | —         |
| 5933                               | —                 | —            | —            | +         |
| 5936                               | +                 | —            | —            | —         |
| 5938                               | +                 | —            | —            | —         |
| 5939                               | +                 | —            | —            | —         |
| 5940                               | —                 | —            | —            | +         |
| 8651                               | —                 | —            | —            | +         |
| 8652                               | —                 | —            | —            | +         |
| 8653                               | —                 | —            | —            | +         |
| 8654                               | —                 | +            | —            | —         |
| <b>Castrated high<br/>dose</b>     | <b>Normal</b>     | <b>LGPIN</b> | <b>HGPIN</b> | <b>Ca</b> |
| 8657                               | —                 | —            | —            | +         |
| 8659                               | +                 | —            | —            | —         |
| 8660                               | —                 | —            | —            | +         |
| 5971                               | —                 | —            | +            | +         |
| 5972                               | —                 | —            | +            | —         |
| 5973                               | —                 | —            | +            | —         |
| 5975                               | —                 | —            | —            | +         |
| 5976                               | —                 | —            | —            | +         |
| 5979                               | —                 | —            | —            | +         |
| 5980                               | Small<br>prostate |              |              |           |

| Group | <i>n</i> | Group ID | Description                            |
|-------|----------|----------|----------------------------------------|
| 1     | 5        | S-Ctrl   | Sham castrated – no drug treatment     |
| 2     | 5        | S-Low    | Sham castrated – low dosage treatment  |
| 3     | 5        | S-High   | Sham castrated – high dosage treatment |
| 4     | 5        | C-Ctrl   | Castrated – no drug treatment          |
| 5     | 5        | C-Low    | Castrated – low dosage treatment       |
| 6     | 5        | C-High   | Castrated – high dosage treatment      |

**Supplementary figure 1: A.** Violin plot showing expression of MST1R in primary prostate tumor tissues classified by pathological stages extracted from TCGA\_PRAD dataset (n = 486, PanCancer Atlas). Each dot represents a single tumor tissue.

**B.** Expression of MST1R, AR and KLK3 in LNCaP and MDA PCa 2b were extracted from the Cancer Cell Line Encyclopedia (CCLE) data [80]. A heatmap was created based on relative overexpression (red) and under expression (green) using the Multi-Experiment Viewer (MeV 4.9) software.

**C.** 2-ME<sub>2</sub> treatment in PC-3 cells affects multiple genes associated with EMT. A 96-well qPCR array of genes associated with EMT was screened using cDNA derived from control or 24h 2-ME<sub>2</sub> treated (3 $\mu$ M) PC-3 cells. Each column represents a single experiment. Data shows fold change in gene expression relative to  $\beta$ -actin. A heatmap was created based on relative overexpression (red) and under expression (green).

**Supplementary figure 2:** Pathological analysis of prostate tumors from individual animals from preclinical study.

**Supplementary figure 3:** Experimental description of metabolomic analysis from serum samples.
